# Supplementary material for: 6-Bromo-3-butyl-2-(4-chlorophenyl)-3H-imidazo[4,5-b]pyridine and its 4-butyl regioisomer: synthesis and analysis of supramolecular assemblies
Source: publisher site journal article supplement (doi:10.1515/zkri-2024-0120), 2025-09-17
Supplement: Supplementary file 1 [file j_zkri-2024-0120_suppl_003.docx]

**6-Bromo-3-butyl-2-(4-chlorophenyl)-3H-imidazo[4,5-b]pyridine and its 4-butyl regioisomer:** **Synthesis and analysis of supramolecular assemblies**

Selma Bourichi,a Khalid Boujdi,b,c Rachida Amanarne,b Younes Ouzidan,b,* Youssef Kandri Rodi,a Fouad Ouazzani Chahdi,a Sang Loon Tand and Edward R. T. Tiekinke,*

a Laboratoire de Chimie-Physique et Biotechnologie des Biomolécules et Matériaux, Faculté des Sciences et Techniques, Université Hassan II, BP 146, Mohammedia 28800, Morocco

b Laboratoire de Chimie Organique Appliquée, Faculté des Sciences et Techniques, Université Sidi Mohamed Ben Abdallah, Route d’Immouzzer, BP 2202 Fez, Morocco

c Univ. Bordeaux, CNRS, Bordeaux INP, CBMN, UMR 5248, 33600 Pessac, France

d Sunway Biofunctional Molecules Discovery Centre, School of Medical and Life Sciences, Sunway University, 47500 Bandar Sunway, Selangor Darul Ehsan, Malaysia

e Department of Chemistry, Universitat de les Illes Balears, Crta de Valldemossa km 7.5, 07122 Palma de Mallorca, Spain

Correspondence authors:

E-mail addresses: [younes.ouzidan@fstm.ac.ma](mailto:younes.ouzidan@fstm.ac.ma) (Y. Ouzidan) and edward.tiekink@uib.es (E.R.T. Tiekink)

***** SUPPLEMENTARY MATERIALS *****


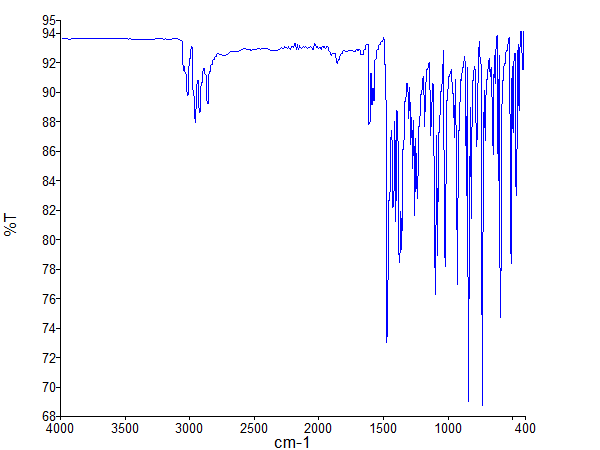


**Figure S1:** The Fourier transform infrared (FTIR) spectrum for **2** was measured on a Perkin Elmer Spectrum two FT-IR spectrophotometer in the range of 450 to 4000 cm-1.


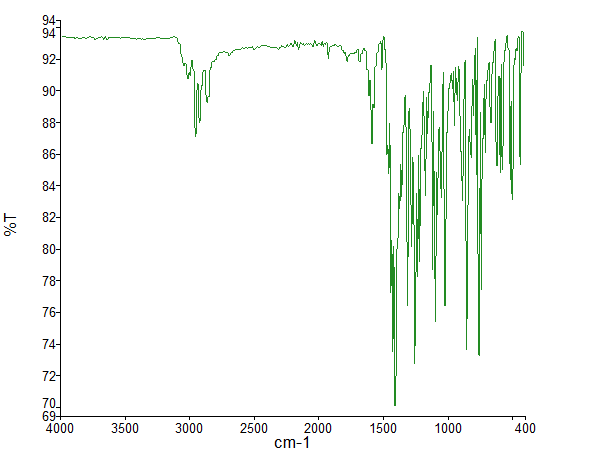


**Figure S2:** The Fourier transform infrared (FTIR) spectrum for **3** was measured on a Perkin Elmer Spectrum two FT-IR spectrophotometer in the range of 450 to 4000 cm-1.


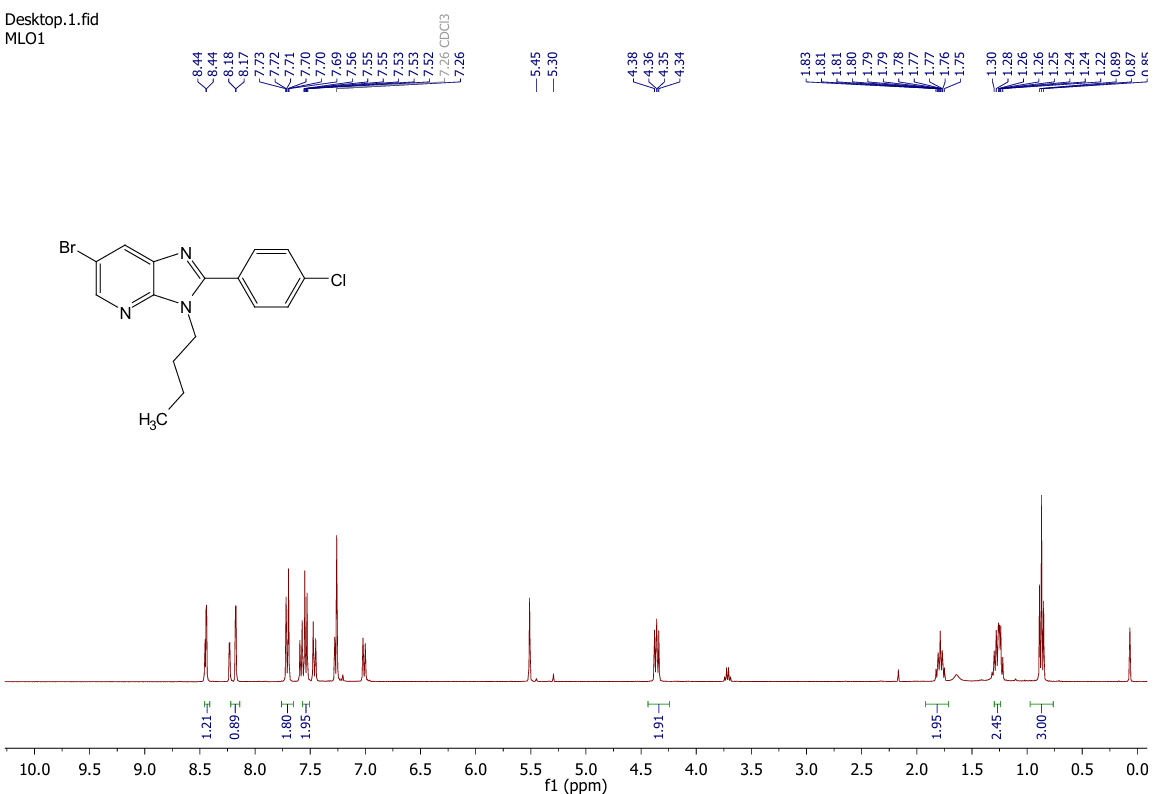


**Figure S3:** The 1H NMR spectrum for **2** measured on a Bruker Avance NEO 400 spectrometer in CDCl3 solution.


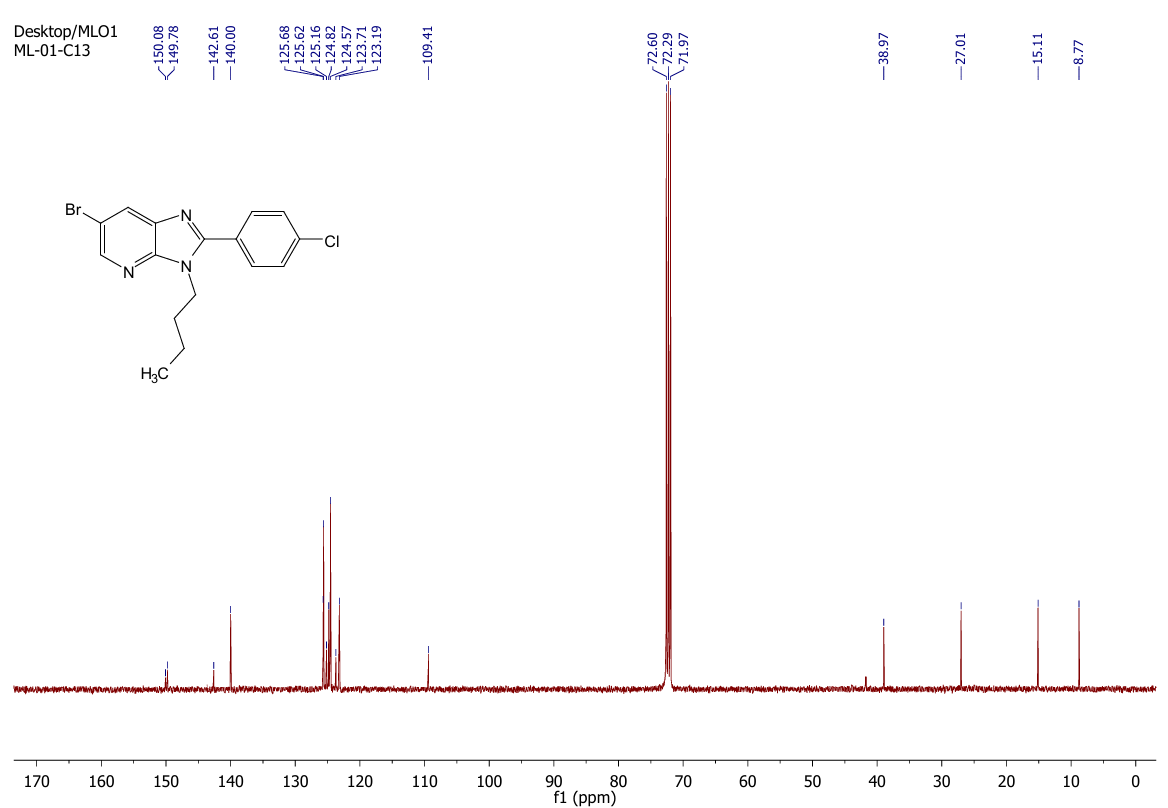


**Figure S4:** The 13C NMR spectrum for **2** measured on a Bruker Avance NEO 400 spectrometer in CDCl3 solution.

**
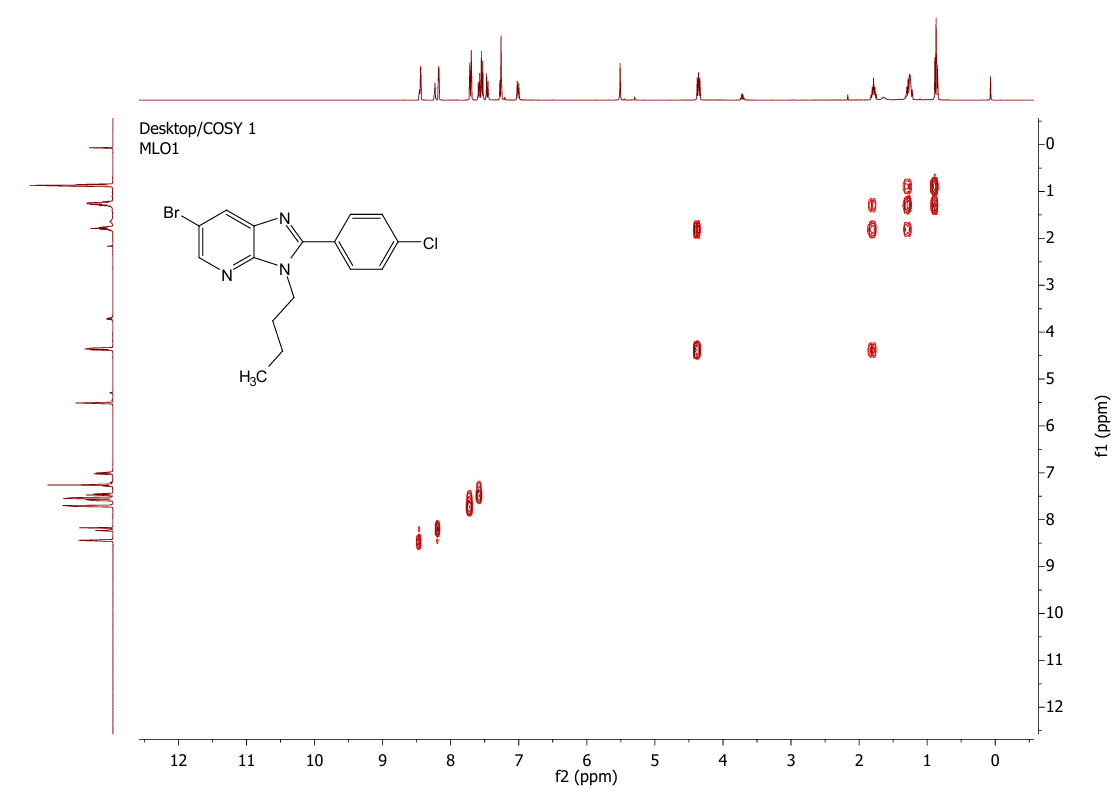
**

**Figure S5:** The COSY spectrum of compound **2** showing ¹H–¹H coupling correlations in CDCl3 solution.

**
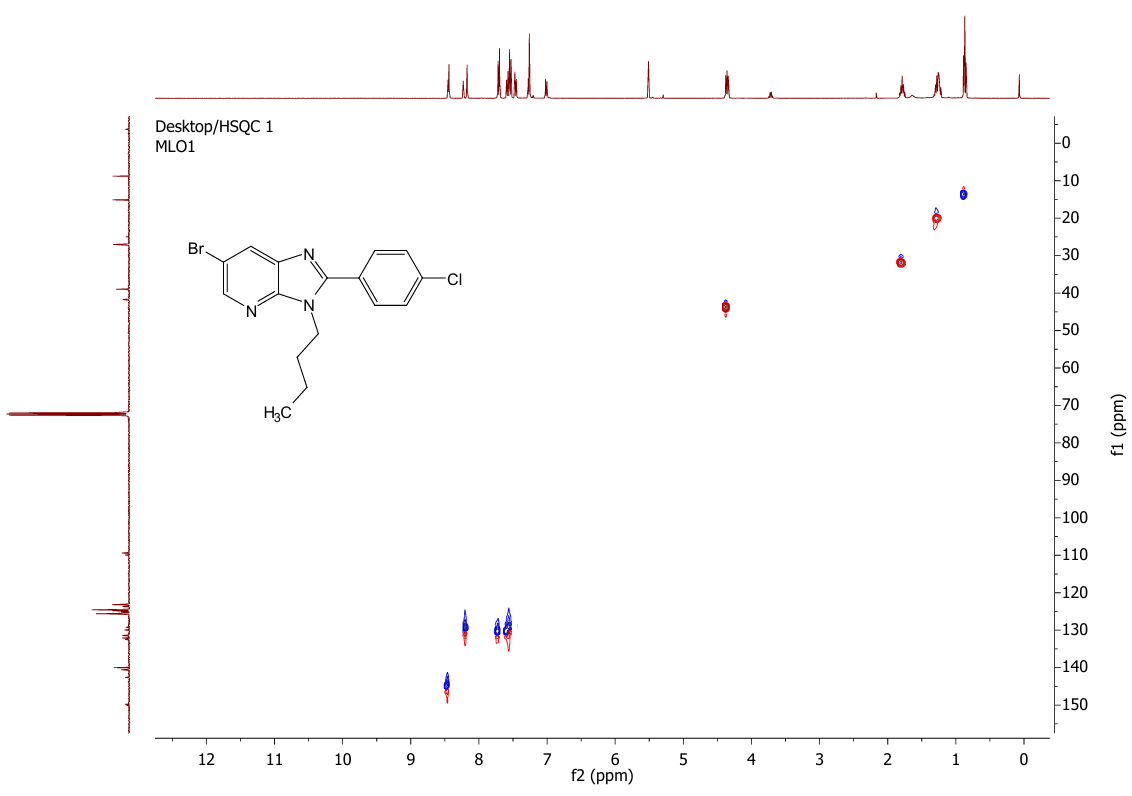
**

**Figure S6:** The HSQC spectrum of compound **2** with ¹H–¹³C correlations in CDCl3 solution.


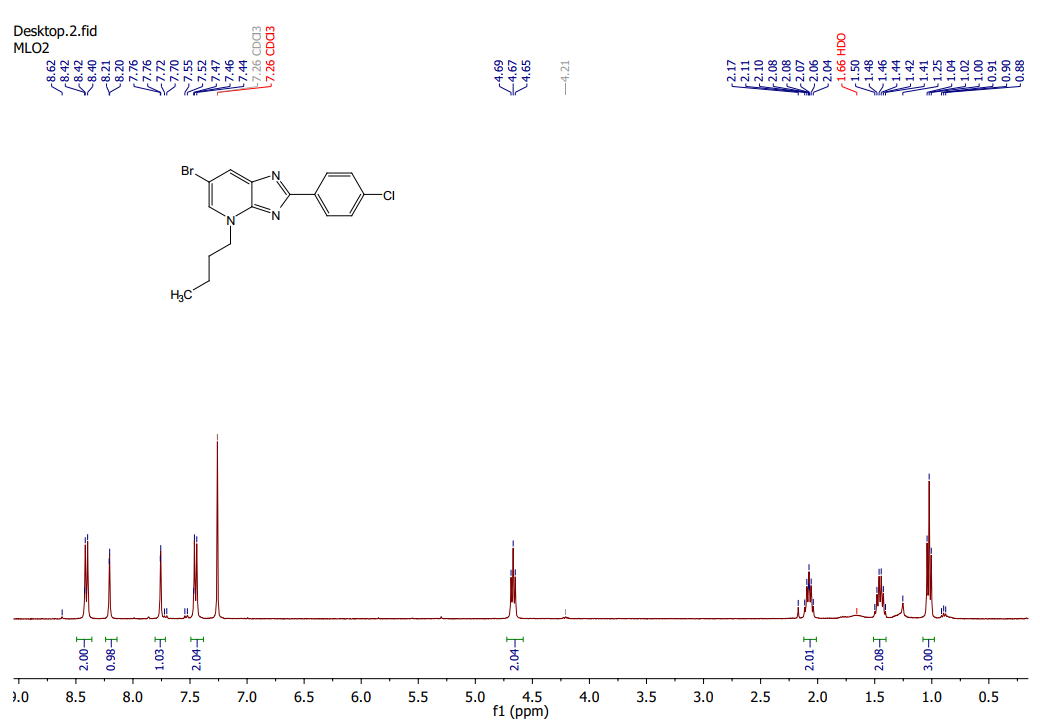


**Figure S7:** The 1H NMR spectrum for compound **3** measured on a Bruker Avance NEO 400 spectrometer in CDCl3 solution.


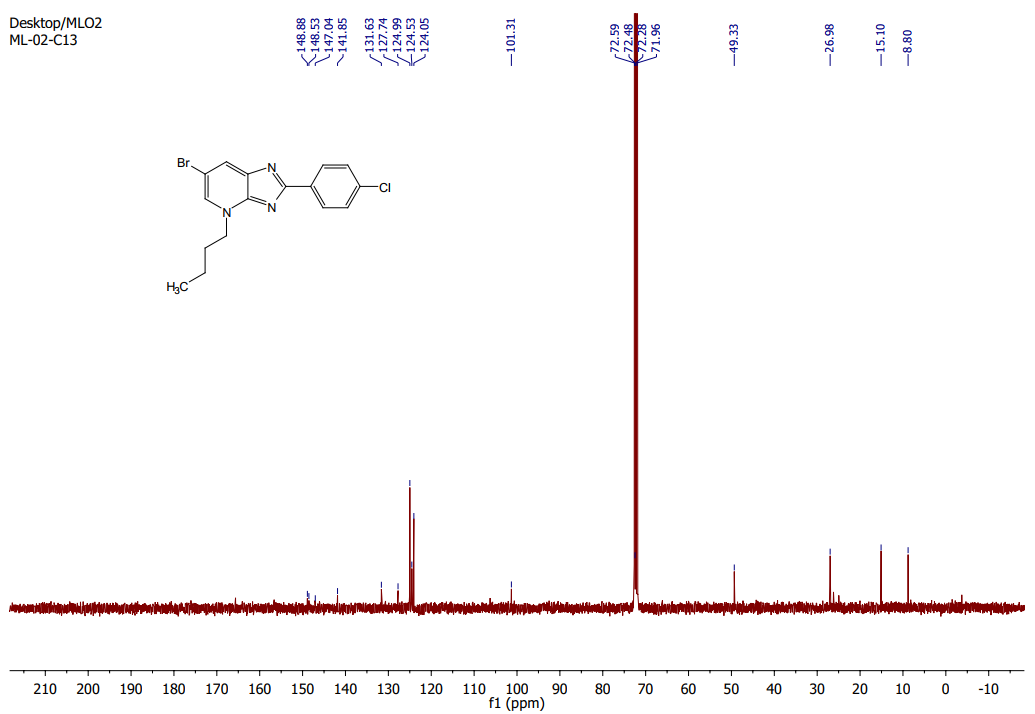


**Figure S8:** The 13C NMR spectrum for compound **3** measured on a Bruker Avance NEO 400 spectrometer in CDCl3 solution.


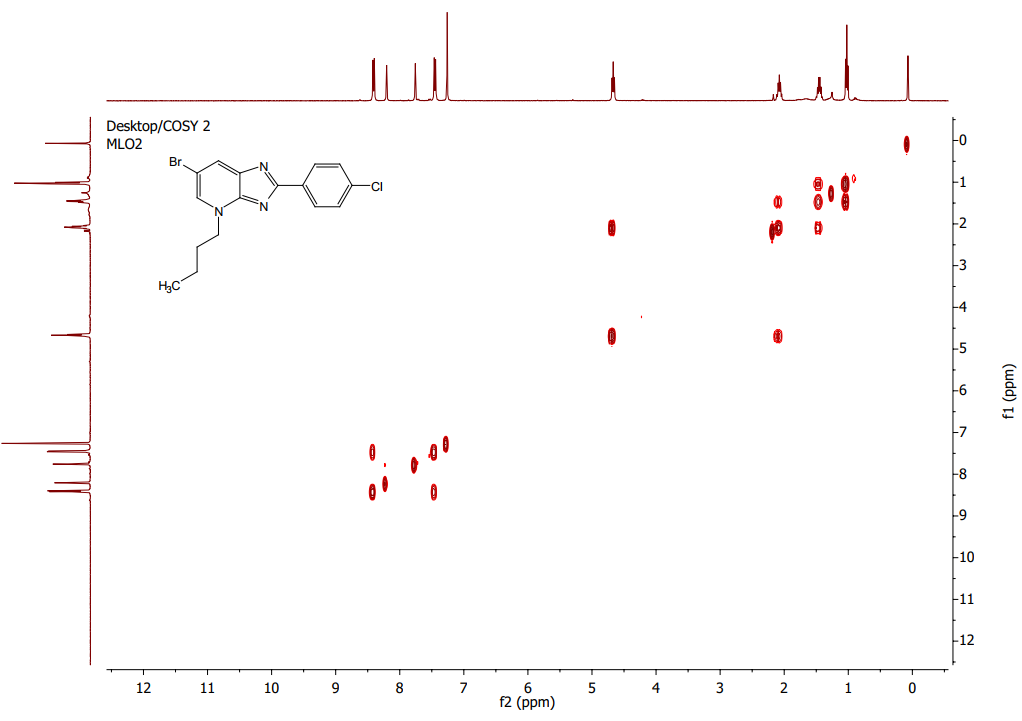


**Figure S9:** The COSY spectrum of compound **3** showing ¹H–¹H coupling correlations in CDCl3 solution.

**
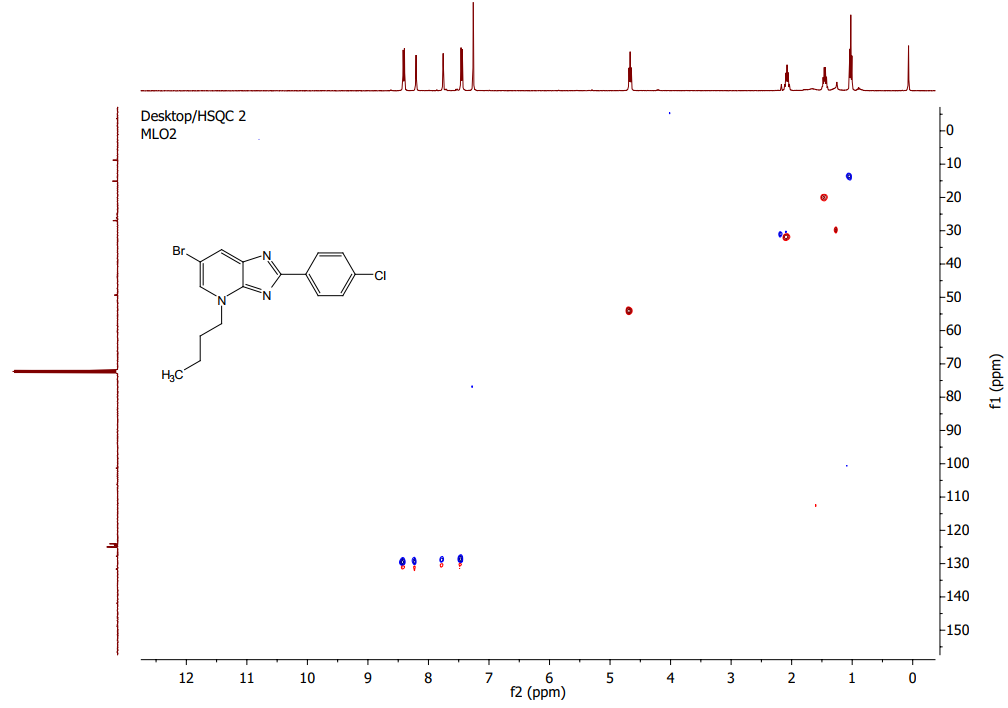
**

**Figure S10:** The HSQC spectrum of compound **3** with ¹H–¹³C correlations in CDCl3 solution.

**Figure S11:** The HPLC/MS spectrum (positive ion mode) for compound **2** measured on an Ultimate 3000 coupled to the Thermo Scientific brand Exactive Plus mass spectrometer.

**Figure S12:** The HPLC/MS spectrum (positive ion mode) for compound **3** measured on an Ultimate 3000 coupled to the Thermo Scientific brand Exactive Plus mass spectrometer.

**Table S1**

Geometric parameters (Å, °) for the experimental structures of **2** and **3**, and the geometry-optimised structures, **opt-2** and **opt-3**.

| Parameter | **2** | **opt-2** | **3** | **opt-3** |
| --- | --- | --- | --- | --- |
| N1–C2 | 1.323(2) | 1.319 | 1.346(2) | 1.341 |
| N1–C7a | 1.379(2) | 1.370 | 1.367(2) | 1.355 |
| N3–C2 | 1.383(2) | 1.387 | 1.375(2) | 1.376 |
| N3–C3a | 1.377(2) | 1.379 | 1.333(2) | 1.322 |
| N3–C31 | 1.468(2) | 1.462 | - | - |
| N4–C41 | - | - | 1.483(2) | 1.474 |
| N4–C3a | 1.331(2) | 1.323 | 1.355(2) | 1.354 |
| N4–C5 | 1.339(2) | 1.333 | 1.357(2) | 1.361 |
| C2–C21 | 1.470(2) | 1.469 | 1.466(2) | 1.462 |
| C7–C7a | 1.397(2) | 1.392 | 1.383(2) | 1.380 |
| C6–Br1 | 1.900(1) | 1.911 | 1.891(2) | 1.907 |
| C24–Cl1 | 1.744(1) | 1.743 | 1.740(2) | 1.746 |
| Br1–C6–C5 | 116.9(1) | 118.4 | 117.3(1) | 117.9 |
| N1–C2–N3 | 113.4(1) | 112.9 | 117.5(1) | 116.6 |
| N3–C2–C21 | 123.7(1) | 125.2 | 119.2(1) | 121.1 |
| N4–C3a–N3 | 126.2(1) | 127.2 | 127.5(1) | 128.4 |
| C2–N3–C3a | 105.6(1) | 105.7 | 101.2(1) | 101.9 |
| C3a–N4–C5 | 113.9(1) | 114.8 | 119.3(1) | 119.1 |
| C7a–N1–C2 | 104.9(1) | 105.5 | 102.6(1) | 103.5 |
| C23–C24–Cl1 | 119.2(1) | 119.6 | 118.7(1) | 119.5 |
| C31–N3–C2 | 130.4(1) | 130.8 | - | - |
| C32–C31–N3 | 113.4(1) | 113.6 | - | - |
| C41–N4–C3a | - | - | 119.6(1) | 120.0 |
| C42–C41–N4 | - | - | 112.5(1) | 112.6 |
| N1–C2–C21–C22 | -141.0(2) | -145.5 | 175.2(1) | 179.9 |
| N1–C2–C21–C26 | 36.9(2) | 32.0 | -4.5(2) | -0.1 |
| N3–C2–C21–C22 | 37.9(2) | 35.7 | -4.4(2) | -0.1 |
| N3–C2–C21–C26 | -144.3(1) | -146.9 | 175.8(1) | 179.9 |
| C31–N3–C2–C21 | 10.7(2) | 6.8 | - | - |
| C31–N3–C2–N1 | -170.4(1) | -172.1 | - | - |
| C32–C31–N3–C2 | -112.0(2) | -108.0 | - | - |
| C33–C32–C31–N3 | -176.2(1) | -179.4 | - | - |
| C34–C33–C32–C31 | -175.3(1) | 179.3 | - | - |
| C41–N4–C3a–N3 | - | - | -0.0(2) | -1.8 |
| C42–C41–N4–C3a | - | - | -108.0(2) | -85.2 |
| C43–C42–C41–N4 | - | - | 175.2(1) | 179.1 |
| C44–C43–C42–C41 | - | - | 178.8(1) | 179.9 |

**Table S2**

The energy-converged coordinates obtained from B3LYP/Def2TZVPP for molecule of **2**, i.e. **opt-2**, in mol2 format.

# T2_SB-12a_Cryst_Opt_b3lyp_def2tzvpp

# Created by GaussView 6.0.16

#

#

#

@<TRIPOS>MOLECULE

Molecule Name

36 38

SMALL

NO_CHARGES

@<TRIPOS>ATOM

1 Br1 5.5241 -1.0975 -0.1695 Br

2 Cl2 -6.5867 -1.7760 -0.0945 Cl

3 N3 0.1555 -1.5079 -0.2388 N

4 N4 -0.1098 0.6545 0.3448 N

5 N5 2.2208 1.2851 0.5132 N

6 C6 -0.7143 -0.5531 0.0284 C

7 C7 1.2476 0.4237 0.2675 C

8 C8 3.4519 0.7930 0.3745 C

9 H9 4.2754 1.4676 0.5667 H

10 C10 3.7064 -0.5335 -0.0022 C

11 C11 2.6791 -1.4311 -0.2482 C

12 H12 2.8654 -2.4568 -0.5310 H

13 C13 1.3897 -0.9286 -0.1009 C

14 C14 -2.1629 -0.7940 0.0050 C

15 C15 -3.0984 0.1593 -0.4079 C

16 H16 -2.7763 1.1338 -0.7427 H

17 C17 -4.4542 -0.1375 -0.4420 C

18 H18 -5.1694 0.6017 -0.7721 H

19 C19 -4.8852 -1.4003 -0.0608 C

20 C20 -3.9744 -2.3708 0.3406 C

21 H21 -4.3220 -3.3523 0.6284 H

22 C22 -2.6238 -2.0657 0.3676 C

23 H23 -1.9049 -2.8140 0.6675 H

24 C24 -0.6788 1.9047 0.8443 C

25 H25 -0.0653 2.2137 1.6917 H

26 H26 -1.6776 1.6943 1.2212 H

27 C27 -0.7034 3.0243 -0.1963 C

28 H28 0.3171 3.2004 -0.5420 H

29 H29 -1.2776 2.7054 -1.0710 H

30 C30 -1.2916 4.3187 0.3654 C

31 H31 -0.7129 4.6256 1.2415 H

32 H32 -2.3091 4.1327 0.7235 H

33 C33 -1.3102 5.4552 -0.6549 C

34 H34 -0.3020 5.6882 -1.0024 H

35 H35 -1.7325 6.3649 -0.2267 H

36 H36 -1.9082 5.1918 -1.5297 H

@<TRIPOS>BOND

1 1 10 1

2 2 19 1

3 3 6 2

4 3 13 Ar

5 4 6 1

6 4 7 Ar

7 4 24 1

8 5 7 2

9 5 8 Ar

10 6 14 1

11 7 13 Ar

12 8 9 1

13 8 10 Ar

14 10 11 Ar

15 11 12 1

16 11 13 Ar

17 14 15 Ar

18 14 22 Ar

19 15 16 1

20 15 17 Ar

21 17 18 1

22 17 19 Ar

23 19 20 Ar

24 20 21 1

25 20 22 2

26 22 23 1

27 24 25 1

28 24 26 1

29 24 27 1

30 27 28 1

31 27 29 1

32 27 30 1

33 30 31 1

34 30 32 1

35 30 33 1

36 33 34 1

37 33 35 1

38 33 36 1

**Table S3**

The energy-converged coordinates obtained from B3LYP/Def2TZVPP for molecule **3**, i.e. **opt-3**, in mol2 format.

# T2_SB-12d_Cryst_Opt_b3lyp_def2tzvpp

# Created by GaussView 6.0.16

#

#

#

@<TRIPOS>MOLECULE

Molecule Name

36 38

SMALL

NO_CHARGES

@<TRIPOS>ATOM

1 Br1 -4.8261 -1.9835 0.1384 Br

2 Cl2 7.2322 -0.4824 0.0836 Cl

3 N3 0.5398 -1.6647 0.2240 N

4 N4 0.5230 0.5559 -0.4189 N

5 N5 -1.8698 0.7936 -0.5722 N

6 C6 1.2444 -0.5637 -0.0734 C

7 C7 -0.7213 0.1167 -0.3333 C

8 C8 -3.0595 0.1507 -0.4224 C

9 H9 -3.9459 0.7284 -0.6267 H

10 C10 -3.1106 -1.1699 -0.0364 C

11 C11 -1.9538 -1.9193 0.2214 C

12 H12 -2.0116 -2.9551 0.5224 H

13 C13 -0.7470 -1.2685 0.0688 C

14 C14 2.7061 -0.5395 -0.0361 C

15 C15 3.4119 0.6254 -0.3543 C

16 H16 2.8611 1.5128 -0.6300 H

17 C17 4.7977 0.6482 -0.3193 C

18 H18 5.3421 1.5484 -0.5656 H

19 C19 5.4871 -0.5042 0.0373 C

20 C20 4.8084 -1.6746 0.3578 C

21 H21 5.3615 -2.5611 0.6327 H

22 C22 3.4235 -1.6873 0.3198 C

23 H23 2.8785 -2.5873 0.5652 H

24 C24 -1.8213 2.2182 -0.9481 C

25 H25 -2.7053 2.4253 -1.5507 H

26 H26 -0.9392 2.3467 -1.5723 H

27 C27 -1.7547 3.1426 0.2657 C

28 H28 -0.8771 2.8792 0.8591 H

29 H29 -2.6317 2.9748 0.8976 H

30 C30 -1.6836 4.6149 -0.1411 C

31 H31 -0.8059 4.7707 -0.7747 H

32 H32 -2.5533 4.8665 -0.7561 H

33 C33 -1.6193 5.5570 1.0594 C

34 H34 -2.5000 5.4478 1.6953 H

35 H35 -1.5671 6.5986 0.7411 H

36 H36 -0.7403 5.3526 1.6734 H

@<TRIPOS>BOND

1 1 10 1

2 2 19 1

3 3 6 Ar

4 3 13 Ar

5 4 6 Ar

6 4 7 2

7 5 7 Ar

8 5 8 Ar

9 5 24 1

10 6 14 1

11 7 13 Ar

12 8 9 1

13 8 10 2

14 10 11 Ar

15 11 12 1

16 11 13 2

17 14 15 Ar

18 14 22 Ar

19 15 16 1

20 15 17 Ar

21 17 18 1

22 17 19 Ar

23 19 20 Ar

24 20 21 1

25 20 22 2

26 22 23 1

27 24 25 1

28 24 26 1

29 24 27 1

30 27 28 1

31 27 29 1

32 27 30 1

33 30 31 1

34 30 32 1

35 30 33 1

36 33 34 1

37 33 35 1

38 33 36 1

**Table S4**

The hybrid composition of selected natural bonding orbitals for opt-1 and opt-2.

| *X*···*Y* | | **Opt-1** | | | **Opt-2** | | |
| --- | --- | --- | --- | --- | --- | --- | --- |
| Overall Occupancy (%) | *s*  (%) | *p*  (%) | Overall Occupancy (%) | *s*  (%) | *p*  (%) |
| C2–N1 | N1 | 56.9 | 33.5 | 65.8 | 57.7 | 32.8 | 66.6 |
|  | C2 | 43.1 | 33.7 | 66.2 | 42.4 | 33.2 | 66.8 |
| C7a–N1 | N1 | 56.4 | 30.7 | 68.8 | 55.9 | 31.2 | 68.2 |
|  | C7a | 43.6 | 31.9 | 68.7 | 44.1 | 32.9 | 67.0 |
| C2–N3 | N3 | 61.9 | 33.3 | 66.5 | 58.2 | 30.7 | 68.7 |
|  | C2 | 38.1 | 29.9 | 70.1 | 41.8 | 31.8 | 68.2 |
| C3a–N3 | N3 | 61.2 | 31.7 | 68.1 | 56.1 | 32.4 | 66.9 |
|  | C3a | 38.8 | 29.2 | 70.7 | 43.9 | 34.9 | 65.0 |
| C3a–C7a | C3a | 50.6 | 35.0 | 64.9 | 51.0 | 33.5 | 66.4 |
|  | C7a | 49.4 | 30.3 | 69.5 | 49.0 | 28.8 | 71.1 |
| C3a–N4 | N4 | 56.8 | 33.6 | 65.9 | 61.7 | 34.2 | 65.6 |
|  | C3a | 43.2 | 35.8 | 64.1 | 38.3 | 31.6 | 68.3 |
| C5–N4 | N4 | 58. | 35.3 | 64.2 | 62.3 | 34.5 | 65.2 |
|  | C5 | 41.3 | 33.2 | 66.8 | 37.7 | 30.4 | 69.5 |
| C5–C6 | C5 | 49.2 | 37.4 | 62.5 | 50.5 | 39.0 | 60.9 |
|  | C6 | 50.8 | 37.9 | 62.0 | 49.5 | 37.8 | 62.1 |
| C6–C7 | C6 | 49.8 | 39.1 | 60.8 | 50.5 | 38.9 | 61.0 |
|  | C7 | 50.2 | 35.6 | 64.2 | 49.5 | 34.7 | 65.1 |
| C7–C7a | C7 | 48.9 | 34.1 | 65.7 | 49.2 | 35.1 | 64.7 |
|  | C7a | 51.1 | 37.8 | 62.1 | 50.8 | 38.3 | 61.6 |
| C2–C21 | C2 | 50.1 | 36.3 | 63.6 | 50.5 | 35.1 | 64.9 |
|  | C21 | 49.9 | 30.5 | 69.4 | 49.5 | 31.3 | 68.6 |
| C21–C22 | C21 | 51.2 | 35.1 | 64.9 | 51.2 | 34.4 | 65.6 |
|  | C22 | 48.8 | 35.3 | 64.6 | 48.8 | 35.0 | 64.8 |
| C21–C26 | C21 | 51.5 | 34.3 | 65.7 | 51.3 | 34.3 | 65.7 |
|  | C26 | 48.5 | 34.9 | 65.0 | 48.7 | 34.8 | 65.0 |
| C22–C23 | C22 | 49.8 | 35.9 | 63.9 | 49.5 | 35.8 | 64.1 |
|  | C23 | 50.2 | 36.2 | 63.7 | 50.5 | 36.2 | 63.6 |
| C23–C24 | C23 | 49.4 | 34.8 | 65.0 | 49.3 | 34.7 | 65.1 |
|  | C24 | 50.6 | 38.1 | 61.9 | 50.7 | 38.2 | 61.7 |
| C24–C25 | C24 | 50.8 | 38.1 | 61.9 | 50.7 | 38.2 | 61.8 |
|  | C25 | 49.2 | 34.6 | 65.2 | 49.3 | 34.6 | 65.2 |
| C25–C26 | C25 | 50.4 | 36.2 | 63.7 | 50.5 | 36.2 | 63.6 |
|  | C26 | 49.6 | 35.9 | 64.0 | 49.5 | 35.8 | 64.1 |

**Table S5**

A comparison of ESP fitted charges for selected atoms between **opt-2** and **opt-3**.

| Atom | ESP charge, *ρ* (a.u.) | |
| --- | --- | --- |
| **Opt-2** | **Opt-3** |
| Br1 | -0.05 | -0.01 |
| Cl1 | -0.01 | -0.11 |
| N1 | -0.62 | -0.72 |
| N3 | -0.17 | -0.57 |
| N4 | -0.60 | 0.13 |
| C2 | 0.37 | 0.70 |
| C21 | 0.20 | -0.09 |
| C22 | -0.31 | -0.13 |
| C23 | 0.01 | -0.07 |
| C24 | -0.03 | 0.03 |
| C25 | 0.03 | -0.08 |
| C26 | -0.29 | -0.09 |
| C3a | 0.50 | 0.29 |
| C5 | 0.41 | -0.05 |
| C6 | -0.38 | -0.24 |
| C7 | 0.04 | -0.09 |
| C7a | 0.15 | 0.32 |
| C31 | -0.33 | - |
| C41 | - | -0.3 |
